# Supplementary material
Source: publisher figshare collection journal article supplement (https://karger.figshare.com/ndownloader/files/25461593)
Supplement: Supplementary file 1 [file 25461593]

**Supplemental Materials**

**Supplemental Table 1: KDQoL-36 at baseline by center**

| KDQoL-SF36 Domain | Center | n | Mean | SD |
| --- | --- | --- | --- | --- |
| Symptom/Problem | 1 | 28 | 66.41 | 23.02 |
| 2 | 127 | 66.51 | 22.34 |
| 3 | 63 | 74.85 | 25.42 |
| 4 | 65 | 69.23 | 19.90 |
| 5 | 71 | 65.72 | 19.46 |
| 6 | 70 | 57.99 | 19.49 |
| 7 | 123 | 74.22 | 20.73 |
| 8 | 70 | 56.39 | 20.57 |
| 9 | 102 | 72.00 | 18.55 |
| 10 | 148 | 79.90 | 22.62 |
| 11 | 60 | 70.68 | 22.95 |
| 12 | 45 | 67.85 | 21.21 |
| Effects of kidney disease | 1 | 28 | 66.41 | 23.02 |
| 2 | 127 | 66.51 | 22.34 |
| 3 | 63 | 74.85 | 25.42 |
| 4 | 65 | 69.23 | 19.90 |
| 5 | 71 | 65.72 | 19.46 |
| 6 | 70 | 57.99 | 19.49 |
| 7 | 123 | 74.22 | 20.73 |
| 8 | 70 | 56.39 | 20.57 |
| 9 | 102 | 72.00 | 18.55 |
| 10 | 148 | 79.90 | 22.62 |
| 11 | 60 | 70.68 | 22.95 |
| 12 | 45 | 67.85 | 21.21 |
| Burden of kidney disease | 1 | 28 | 39.29 | 29.85 |
| 2 | 127 | 34.60 | 21.27 |
| 3 | 63 | 51.79 | 29.20 |
| 4 | 65 | 35.19 | 23.74 |
| 5 | 71 | 38.82 | 29.50 |
| 6 | 70 | 54.55 | 28.03 |
| 7 | 123 | 54.17 | 28.39 |
| 8 | 70 | 43.57 | 25.16 |
| 9 | 102 | 50.67 | 20.77 |
| 10 | 148 | 52.87 | 28.84 |
| 11 | 60 | 49.90 | 29.57 |
| 12 | 45 | 35.56 | 26.68 |
| SF-12 Physical | 1 | 28 | 38.72 | 11.07 |
| 2 | 127 | 39.83 | 10.90 |
| 3 | 63 | 45.38 | 10.06 |
| 4 | 65 | 36.74 | 11.46 |
| 5 | 71 | 39.86 | 10.77 |
| 6 | 70 | 44.42 | 8.99 |
| 7 | 123 | 44.67 | 10.70 |
| 8 | 69 | 39.18 | 9.98 |
| 9 | 102 | 40.11 | 11.57 |
| 10 | 148 | 42.29 | 11.34 |
| 11 | 60 | 39.05 | 12.21 |
| 12 | 45 | 38.35 | 10.44 |
| SF-Mental | 1 | 28 | 48.75 | 13.31 |
| 2 | 127 | 47.99 | 11.75 |
| 3 | 63 | 52.37 | 11.22 |
| 4 | 65 | 46.90 | 12.09 |
| 5 | 71 | 49.93 | 11.09 |
| 6 | 70 | 54.02 | 9.30 |
| 7 | 123 | 56.22 | 10.45 |
| 8 | 69 | 47.37 | 11.49 |
| 9 | 102 | 53.22 | 8.94 |
| 10 | 148 | 51.19 | 11.30 |
| 11 | 60 | 49.73 | 14.97 |
| 12 | 45 | 50.48 | 12.52 |
